# Supplementary material
Source: PubMed Central journal article supplement (PMC4941214)
Supplement: PRO-25-865-s001.pdf [file PRO-25-865-s001.pdf]

# Supplementary Material

## **G-LoSA: an efficient computational tool for local structure-centric biological studies and drug design**

Hui Sun Lee and Wonpil Im

| Type | Description                 |
|------|-----------------------------|
| HD   | Hydrogen bond donor         |
| HA   | Hydrogen bond acceptor      |
| OH   | Hydroxyl group              |
| PC   | Positively charged atom     |
| NC   | Negatively charged atom     |
| AR   | Aromatic ring               |
| AL   | Aliphatic hydrophobic group |

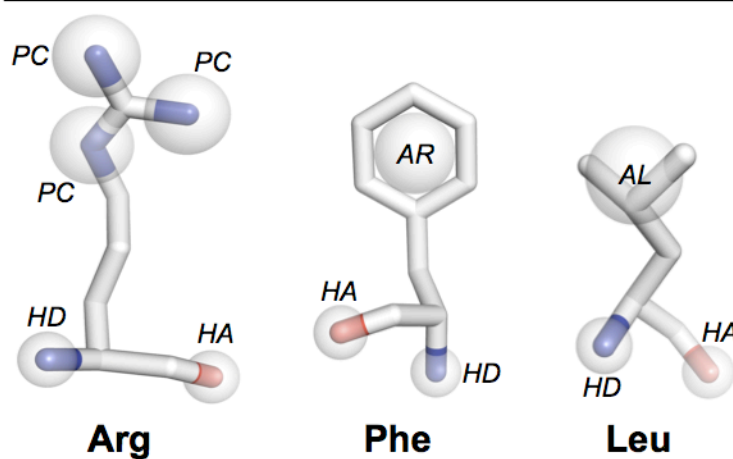

**Figure S1.** Definition of chemical features. For representative examples, the chemical feature points of three residues (Arg, Phe, and Leu) are illustrated as sphere representations.

**Table S1.** Definition of chemical features for each amino acid.

| <b>Amino acid</b> | <b>Chemical feature (PDB atom name)</b>                                                     |
|-------------------|---------------------------------------------------------------------------------------------|
| Ala               | HD (N), HA (O), AL (CB)                                                                     |
| Arg               | HD (N), HA (O), PC (NE), PC (NH1), PC (NH2)                                                 |
| Asn               | HD (N), HA (O), HD (ND2), HA (OD1)                                                          |
| Asp               | HD (N), HA (O), NC (OD1), NC (OD2)                                                          |
| Cys               | HD (N), HA (O), AL (SG)                                                                     |
| Gln               | HD (N), HA (O), HD (NE2), HA (OE1)                                                          |
| Glu               | HD (N), HA (O), NC (OE1), NC (OE2)                                                          |
| Gly               | HD (N), HA (O)                                                                              |
| His               | HD (N), HA (O), PC (ND1), PC (NE2)                                                          |
| Ile               | HD (N), HA (O), AL (CB, CG1, CG2, CD1)                                                      |
| Leu               | HD (N), HA (O), AL (CG, CD1, CD2)                                                           |
| Lys               | HD (N), HA (O), PC (NZ)                                                                     |
| Met               | HD (N), HA (O), AL (CE)                                                                     |
| Phe               | HD (N), HA (O), AR (CG, CD1, CD2, CE1, CE2, CZ)                                             |
| Pro               | HA (O), HA (N)                                                                              |
| Ser               | HD (N), HA (O), OH (OG)                                                                     |
| Thr               | HD (N), HA (O), OH (OG1), AL (CG2)                                                          |
| Trp               | HD (N), HA (O), HD (NE1), AR (CD2, CE2, CE3, CZ2, CZ3, CH2),<br>AR (CG, CD1, CD2, NE1, CE2) |
| Tyr               | HD (N), HA (O), AR (CG, CD1, CD2, CE1, CE2, CZ)                                             |
| Val               | HD (N), HA (O), AL (CB, CG1, CG2)                                                           |

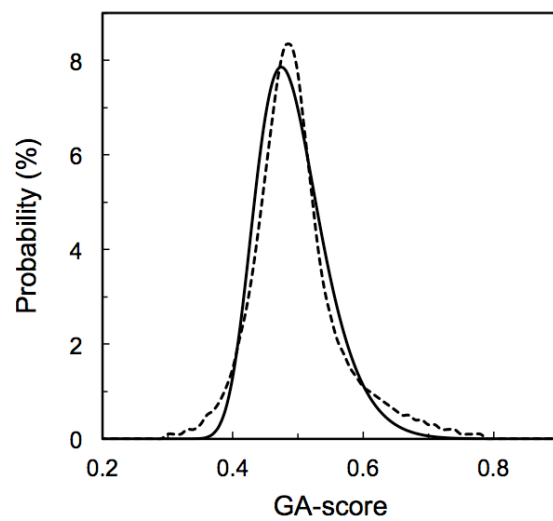

**Figure S2.** GA-score distribution from the random local structures. The dashed line is the observed probability density and the solid line is a direct fit using the Gumbel distribution.

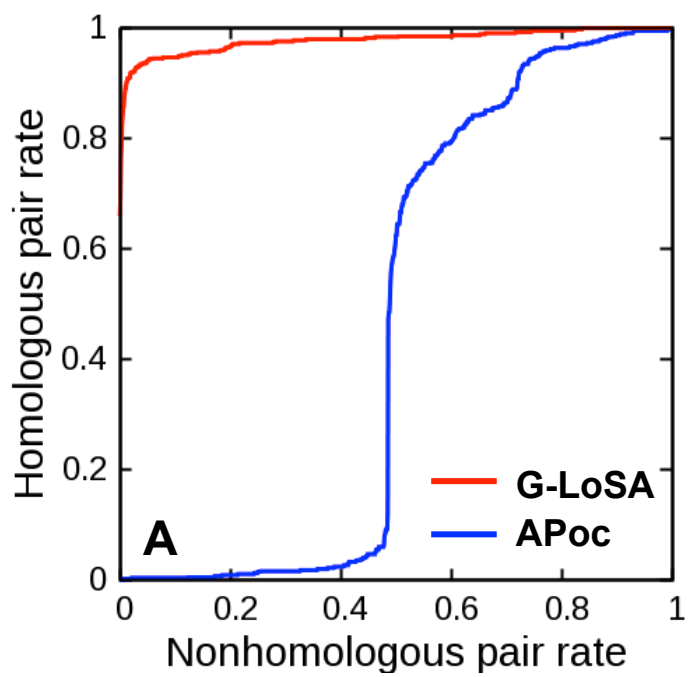

**Figure S3.** ROC plots of G-LoSA and APoc for  $\text{Ca}^{2+}$ -binding site benchmark set.

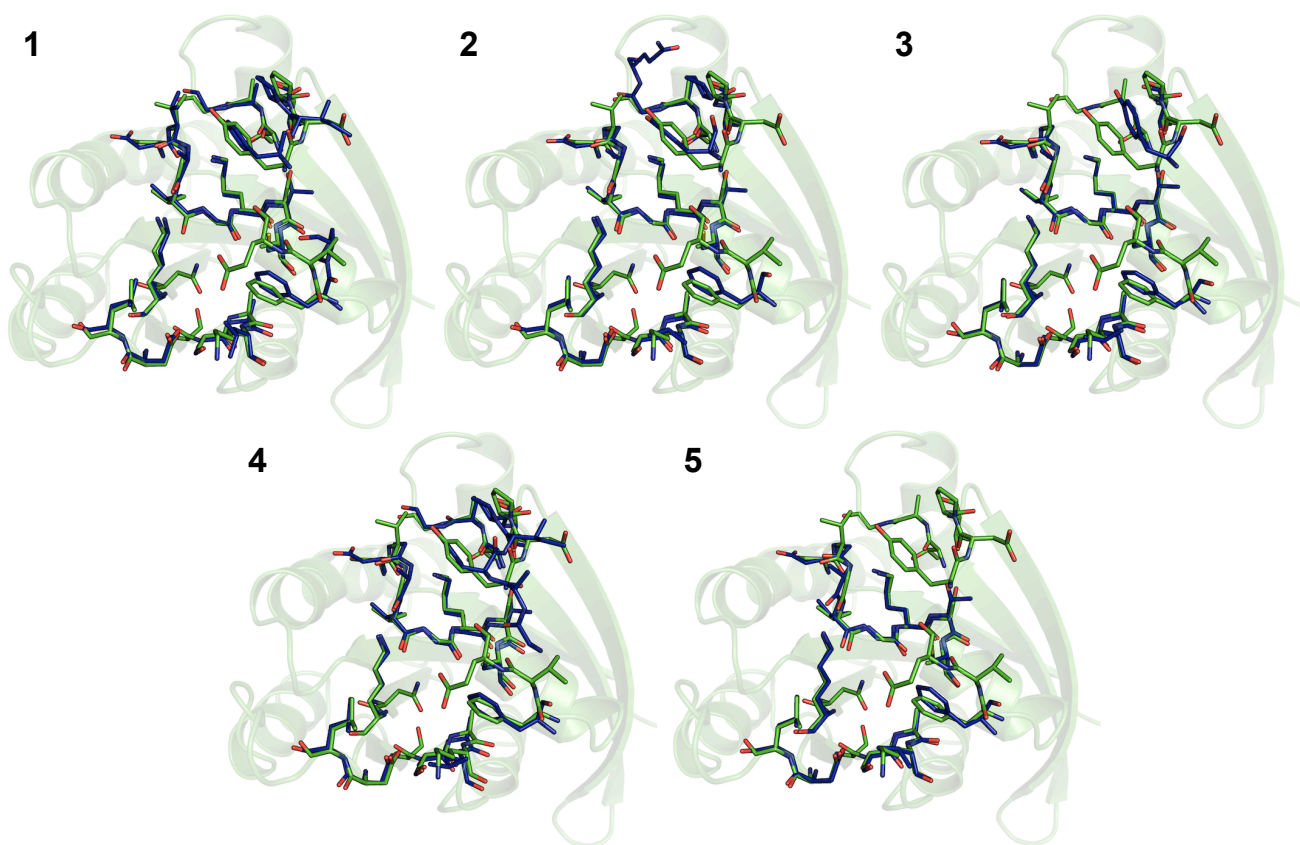

| Template | GA-score (1) | TM-score (2) | Average of (1) and (2) | Recall value |
|----------|--------------|--------------|------------------------|--------------|
| 1        | 0.890        | 0.898        | 0.894                  | 0.846        |
| 2        | 0.882        | 0.897        | 0.889                  | 0.808        |
| 3        | 0.897        | 0.891        | 0.889                  | 0.654        |
| 4        | 0.875        | 0.901        | 0.888                  | 0.846        |
| 5        | 0.893        | 0.882        | 0.887                  | 0.577        |

**Figure S4.** The aligned structures of the top five ligand BS templates onto the target protein. The target protein and its native ligand BS (green) in cartoon and stick representation, respectively, are shown with the aligned templates (blue) in stick representation.

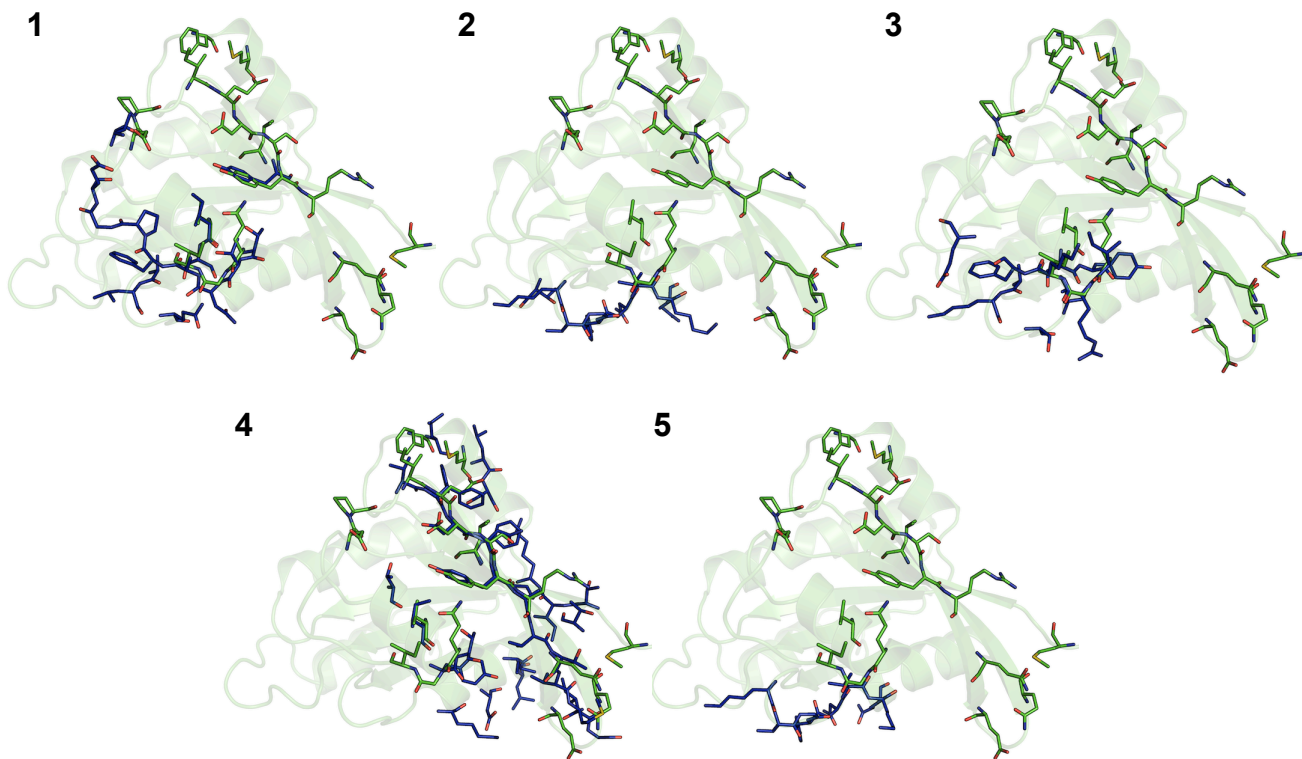

| Template | GA-score (1) | TM-score (2) | Average of (1) and (2) | Recall value |
|----------|--------------|--------------|------------------------|--------------|
| 1        | 0.722        | 0.900        | 0.811                  | 0.368        |
| 2        | 0.766        | 0.854        | 0.810                  | 0            |
| 3        | 0.732        | 0.888        | 0.810                  | 0.158        |
| 4        | 0.727        | 0.889        | 0.808                  | 0.579        |
| 5        | 0.769        | 0.847        | 0.808                  | 0            |

**Figure S5.** The aligned structures of the top five protein BS templates onto the target protein. The target protein and its native protein BS (green) in cartoon and stick representation, respectively, are shown with the aligned templates (blue) in stick representation.

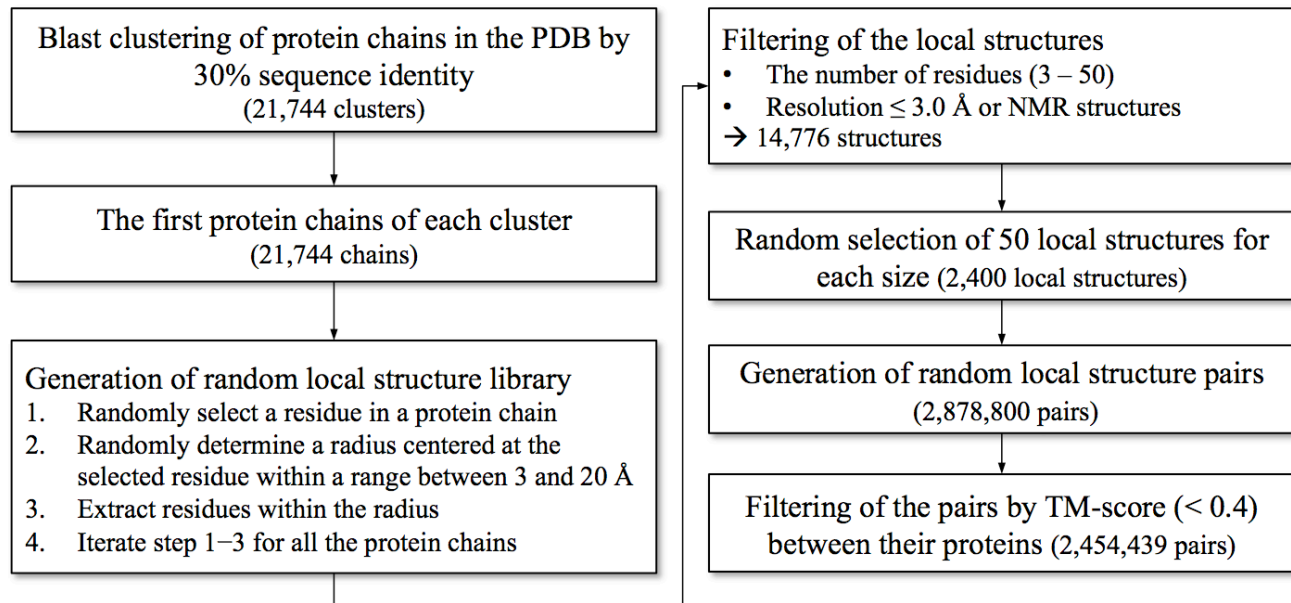

**Figure S6.** Schematic illustration of the overall procedure for the random local structure set preparation.
